# Supplementary material
Source: publisher site journal article supplement (https://www.dovepress.com/article/340764)
Supplement: Supplementary file 1 [file get_supplementary_file.php]

**Folic acid decorated zeolitic imidazolate framework (ZIF-8) loaded with baicalin as a nano-drug delivery system for breast cancer therapy**

Xiao Mi1, Meigeng Hu1, Mingran Dong1, Zhihong Yang1, Xia Zhan2, Xinyue Chang1, Juan Lu1*, Xi Chen1*

1 Institute of Medicinal Plant Development, Chinese Academy of Medical Sciences, Peking Union Medical College, Beijing 100094, China;

2 Key Laboratory of Cleaner Production and Integrated Resource Utilization of China National Light Industry, Beijing Technology and Business University, Beijing 100048, China

Correspondence: Xi Chen, Juan Lu

Institute of Medicinal Plant Development, Chinese Academy of Medical Sciences, Peking Union Medical College, Beijing 100094, China;

Tel 010-57833257

Email [chenxi@implad.ac.cn;](mailto:chenxi@implad.ac.cn;) [jlu@implad.ac.cn](mailto:jlu@implad.ac.cn)


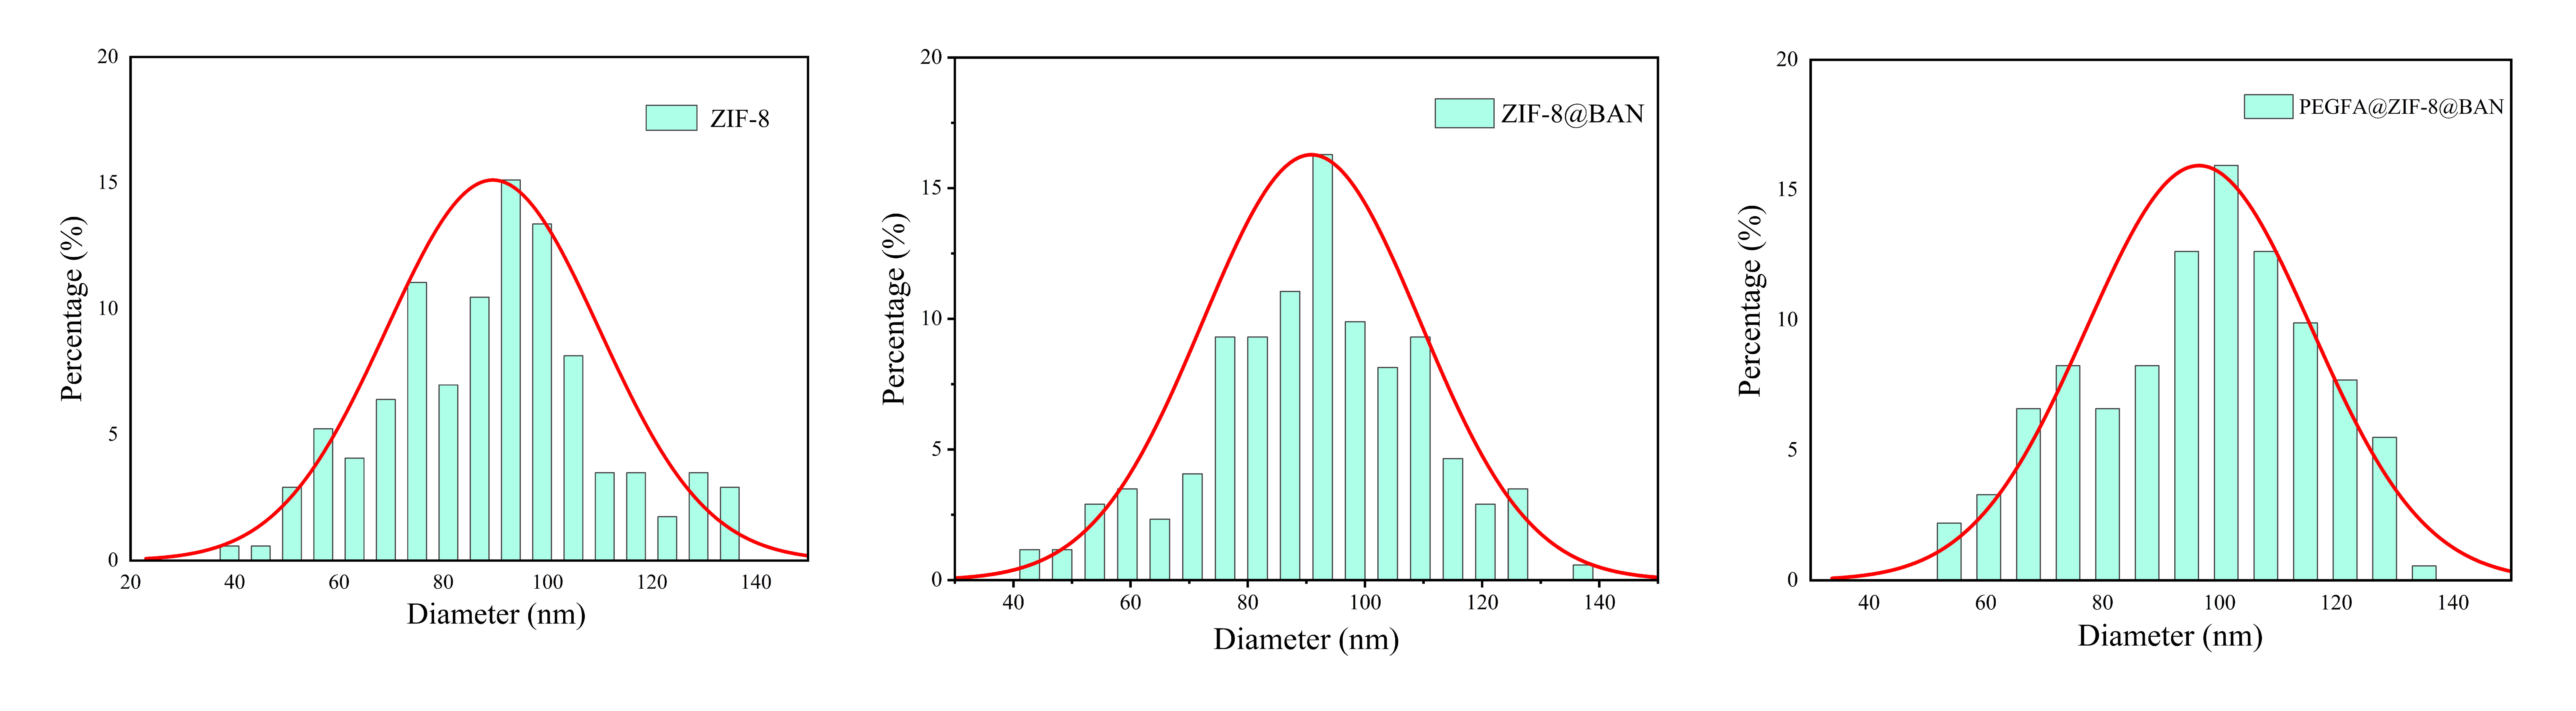


Fig.S1. Size histograms of ZIF-8, ZIF-8@BAN, PEG-FA@ZIF-8@BAN in SEM images.


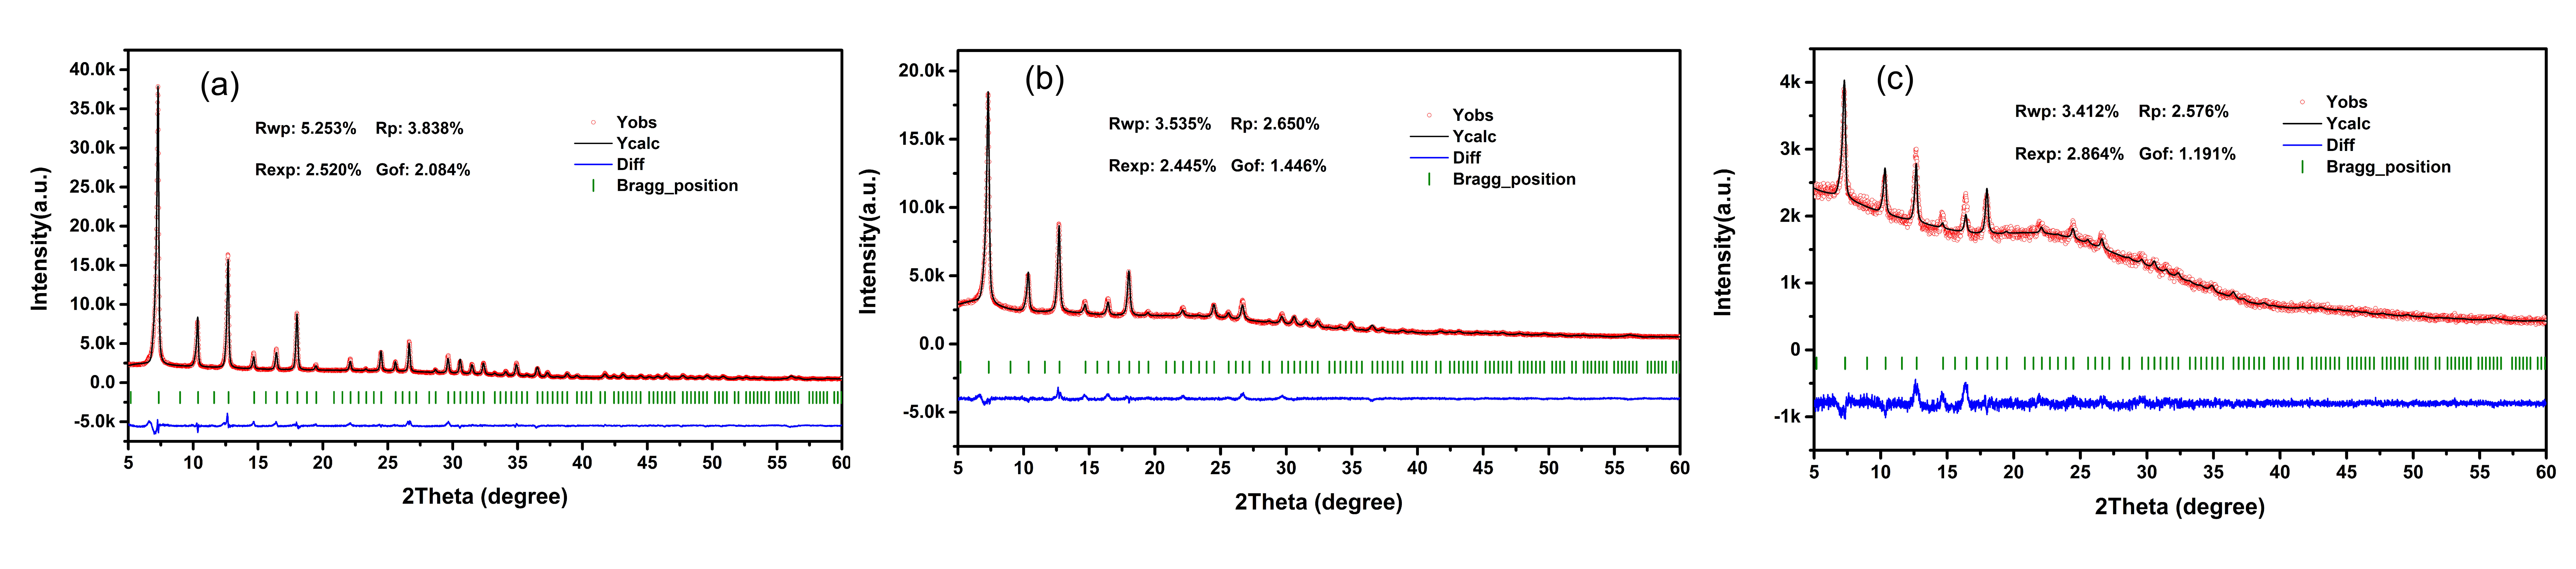


Fig.S2. Rietveld analysis of ZIF-8 (a), ZIF-8@BAN (b), PEG-FA@ZIF-8@BAN (c).


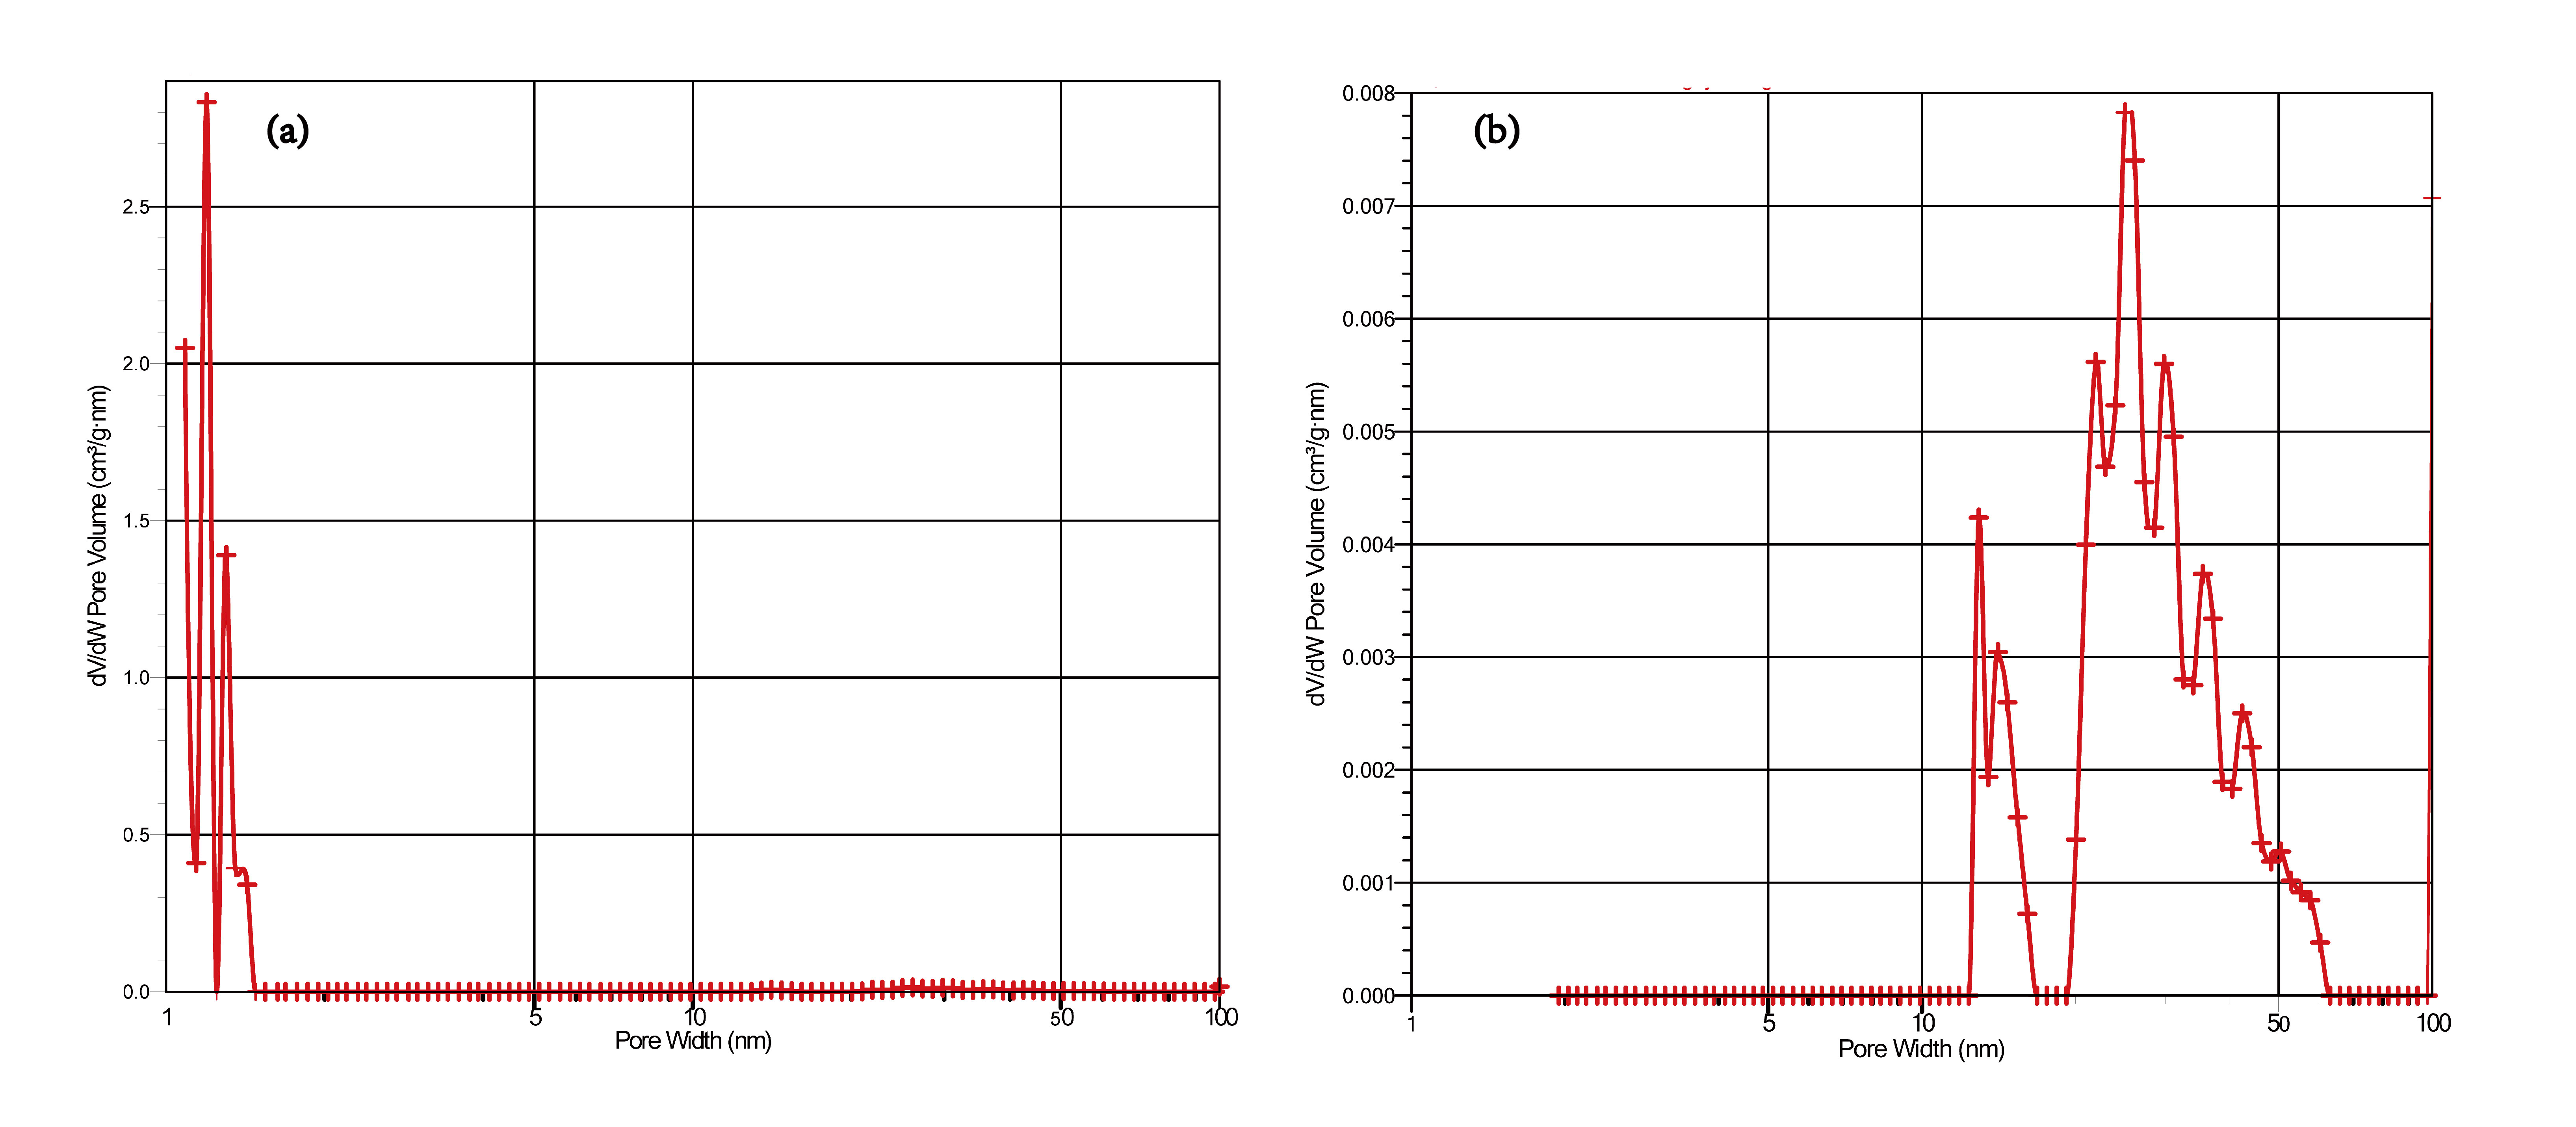


Fig.S3. Pore size distributions of ZIF-8 (a) and PEG-FA@ZIF-8@BAN (b).


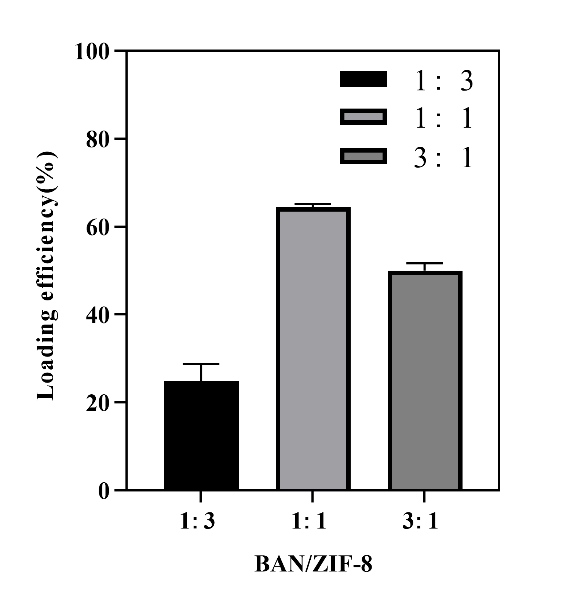


Fig.S4. The loading efficiency of ZIF-8@BAN increased with BAN feeding.


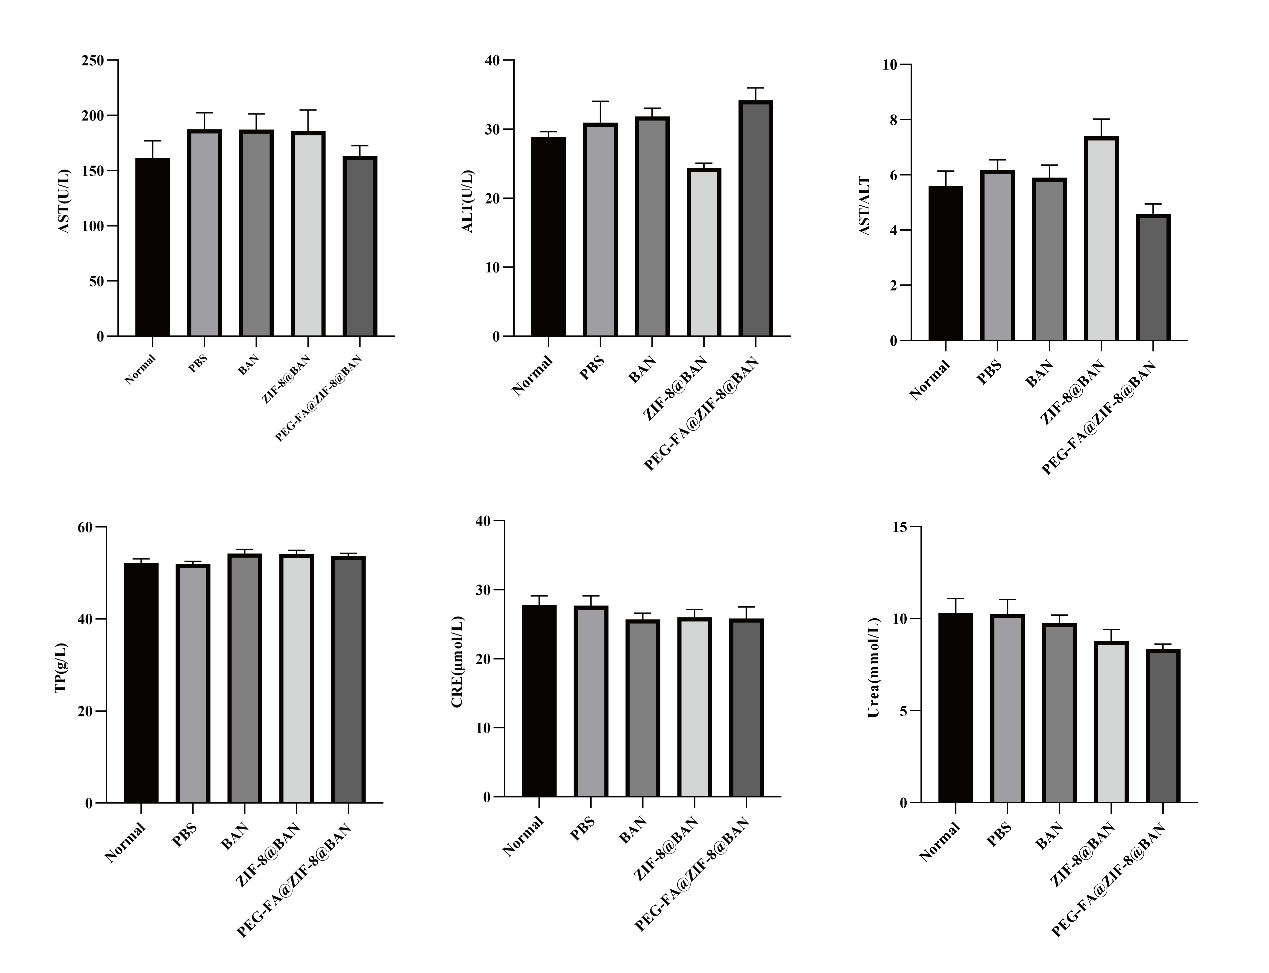


Fig.S5. Blood biochemical analysis of healthy mice and mice in each treatment group.
